# Supplementary material
Source: Springer Nature journal article supplement (https://www.springermedizin.de/resource/supplementary/13002_2011_232_MOESM4_ESM.pdf/9627434)

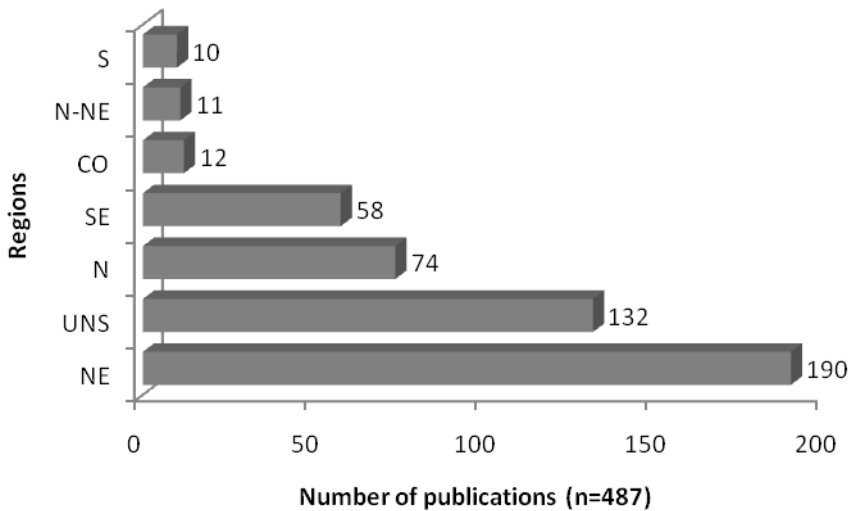

Supplement: MOESM4 [file 9627434]
